# Supplementary material for: Diketopyrrolopyrrole-based sensitizers for dye-sensitized solar cell applications: anchor engineering
Source: Royal Society of Chemistry journal article supplement (doi:10.1039/c3ta13643d), 2013-01-01
Supplement: c3ta13643d.pdf [file c3ta13643d.pdf]

## SUPPLEMENTARY INFORMATION

### Diketopyrrolopyrrole-based Sensitizers for Dye-sensitized Solar cell Applications: Anchor Engineering

Thomas W. Holcombe, Jun-Ho Yum, Yongjoo Kim, Kasparas Rakstys, and Michael Grätzel

#### **Table of contents**

Page 2 Synthetic methods and materials

Page 7 Computational discussion

Page 8 Photovoltaic data of DSCs sensitized with DPP dyes.

Page 9 References

**Synthetic Methods and Materials:** All reagents from commercial sources were used without further purification, unless otherwise noted. All reactions were performed under dry N<sub>2</sub>, unless otherwise noted. All dry reactions were performed with glassware that was flamed under high-vacuum and backfilled with N<sub>2</sub>. All extracts were dried over powdered MgSO<sub>4</sub> and solvents removed by rotary evaporation under reduced pressure. Flash chromatography was performed using Silicycle UltraPure SilicaFlash P60, 40-63 μm (230-400 mesh). <sup>1</sup>H and <sup>13</sup>C NMR spectra were recorded on a Bruker Avance-400 (400 MHz), Bruker AvanceIII-400 (400MHz), Bruker DPX-400 (400 MHz), or Bruker DRX-600 spectrometer and are reported in ppm using solvent as an internal standard: Methylene Chloride-d<sub>2</sub> at 5.32 ppm and 54.00 ppm for <sup>1</sup>H and <sup>13</sup>C, respectively; THF-d<sub>8</sub> at 3.58 ppm and 67.57 ppm for <sup>1</sup>H and <sup>13</sup>C, respectively.

### Synthetic Procedures:

3-(4-bromophenyl)-2,5-bis(2-ethylhexyl)-6-(thiophen-2-yl)pyrrolo[3,4-c]pyrrole-1,4(2H,5H)-dione (Th-DPP\_EtHex-Ph-Br) and **DPP07** were synthesized previously, in reference [9].

3-(5-bromopyridin-2-yl)-2,5-bis(2-ethylhexyl)-6-(thiophen-2-yl)pyrrolo[3,4-c]pyrrole-1,4(2H,5H)-dione (Th-DPP\_EtHex-Py-Br) was synthesized as in reference [9].

<sup>1</sup>H NMR (400 MHz, Methylene Chloride-d<sub>2</sub>) δ 9.05 (d, *J* = 3.7 Hz, 1H), 8.86 (d, *J* = 8.6 Hz, 1H), 8.74 (d, *J* = 2.3 Hz, 1H), 8.01 (dd, *J* = 8.6, 2.4 Hz, 1H), 7.74 (d, *J* = 4.8 Hz, 1H), 7.34 – 7.29 (m, 1H), 4.36 – 4.22 (m, 2H), 4.06 – 3.91 (m, 2H), 1.90 – 1.78 (m, 1H), 1.60 – 1.51 (m, 1H), 1.42 – 1.11 (m, 16H), 0.92 – 0.79 (m, 12H). <sup>13</sup>C NMR (100 MHz, Methylene Chloride-d<sub>2</sub>) δ 162.77, 162.25, 150.50, 147.10, 143.18, 142.62, 140.02, 136.89, 132.34, 130.19, 129.02, 128.46, 122.28, 111.38, 109.17, 46.33, 46.32, 46.26, 40.36, 39.68, 39.67, 32.51, 31.11, 31.09, 30.74, 30.72, 30.49, 30.28, 30.24, 29.94, 29.19, 28.93, 28.92, 24.44, 24.05, 23.63, 23.61, 14.46, 14.40, 14.36, 11.08, 10.77.

### Th-DPP\_EtHex-Py-Benzaldehyde

In a 50 mL single-neck round-bottom flask, 1.00 grams of Th-DPP\_EtHex-Py-Br (1.67 mmol), 0.58 grams of 4-formylphenylboronic acid, pinacol ester (2.50 mmol), and 1.06 grams of potassium phosphate tribasic (5.00 mmol) were dissolved in 15 mL of toluene, 1 mL tAmylOH, and 0.5 mL water. This solution was degassed for 20 minutes with a stream of N<sub>2</sub>, after which time 10 mg of Pd<sub>2</sub>dba<sub>3</sub> and 20 mg of X-Phos were added simultaneously, in one batch. The reaction was then brought to 80 °C for 6 hours, and then diluted with DCM and plugged through a thin pad of MgSO<sub>4</sub> with DCM. Volatile organics were removed and the crude compound loaded onto a medium column loaded with 200 mL of silica. A gradient eluent of 40:60 Toluene:DCM to 100% DCM was used to purify the compound. 0.84 grams (81% yield) of a pure red solid was obtained.

<sup>1</sup>H NMR (400 MHz, Methylene Chloride-d<sub>2</sub>) δ 10.05 (s, 1H), 9.07 (d, *J* = 4.0 Hz, 1H), 9.04 (d, *J* = 8.3 Hz, 1H), 8.97 (d, *J* = 2.4 Hz, 1H), 8.12 (dd, *J* = 8.4, 2.4 Hz, 1H), 8.03 – 7.97 (m, 2H), 7.85

(d,  $J = 8.1$  Hz, 2H), 7.73 (d,  $J = 4.8$  Hz, 1H), 7.34 – 7.28 (m, 1H), 4.45 – 4.30 (m, 2H), 4.07 – 3.91 (m, 2H), 1.89 – 1.79 (m, 1H), 1.66 – 1.57 (m, 1H), 1.45 – 1.14 (m, 16H), 0.95 – 0.77 (m, 12H).  $^{13}\text{C}$  NMR (100 MHz, Methylene Chloride- $d_2$ )  $\delta$  191.98, 162.73, 162.30, 148.30, 147.86, 143.32, 143.11, 142.93, 136.86, 136.69, 135.70, 135.52, 132.25, 130.85, 130.20, 128.99, 128.17, 127.33, 111.44, 109.27, 46.35, 46.29, 40.35, 39.69, 39.68, 31.12, 31.10, 30.73, 30.71, 29.19, 28.92, 28.91, 24.47, 24.04, 23.63, 23.61, 14.43, 14.37, 11.12, 10.77.

#### Br-Th-DPP EtHex-Py-Benzaldehyde

In a 50 mL single-neck round-bottom flask, 0.84 gram of Th-DPP\_EthHex-Py-Benzaldehyde (1.35 mmol) was dissolved in 20 mL of chloroform, and 0.25 gram NBS (1.40 mmol) was added in one batch at room temperature. This reaction was stirred for 2 hour at which point the solution was loaded directly onto a short silica column and eluted with 20:80 Tol:DCM. 0.47 grams (50% yield) of red/purple solid was obtained.

$^1\text{H}$  NMR (400 MHz, Methylene Chloride- $d_2$ )  $\delta$  10.07 (s, 1H), 9.03 (d,  $J = 8.4$  Hz, 1H), 8.98 (d,  $J = 2.3$  Hz, 1H), 8.81 (d,  $J = 4.3$  Hz, 1H), 8.13 (dd,  $J = 8.4, 2.4$  Hz, 1H), 8.01 (d,  $J = 8.2$  Hz, 2H), 7.86 (d,  $J = 8.1$  Hz, 2H), 7.27 (d,  $J = 4.2$  Hz, 1H), 4.43 – 4.28 (m, 2H), 3.91 (p,  $J = 7.4$  Hz, 2H), 1.89 – 1.78 (m, 1H), 1.67 – 1.56 (m, 1H), 1.44 – 1.13 (m, 16H), 0.94 – 0.78 (m, 12H).  $^{13}\text{C}$  NMR (100 MHz, Methylene Chloride- $d_2$ )  $\delta$  192.02, 162.50, 162.25, 148.23, 147.94, 143.62, 143.31, 141.50, 136.74, 135.89, 135.57, 132.14, 131.71, 130.89, 128.23, 127.43, 120.24, 111.34, 109.53, 46.44, 46.41, 40.35, 39.71, 31.12, 31.10, 30.69, 30.67, 29.20, 28.89, 28.88, 24.46, 24.06, 23.61, 14.42, 14.37, 11.11, 10.76.

#### HexOTPA-Th-DPP EtHex-Py-Benzaldehyde

The reaction and purification were performed in the same manner as for the synthesis of Th-DPP\_EthHex-Py-Benzaldehyde, with the coupling partner *N,N*-bis[4-(hexyloxy)phenyl]-4-(4,4,5,5-tetramethyl-1,3,2-dioxaborolan-2-yl)-benzamine. 125 mg (55% yield) of purple-ish/blue solid was obtained.

$^1\text{H}$  NMR (400 MHz, Methylene Chloride- $d_2$ )  $\delta$  10.05 (s, 1H), 9.22 (d,  $J = 4.2$  Hz, 1H), 9.05 (d,  $J = 8.4$  Hz, 1H), 8.96 (d,  $J = 2.3$  Hz, 1H), 8.10 (dd,  $J = 8.5, 2.5$  Hz, 1H), 8.03 – 7.96 (m, 2H), 7.88 – 7.81 (m, 2H), 7.51 – 7.45 (m, 2H), 7.37 (d,  $J = 4.2$  Hz, 1H), 7.12 – 7.04 (m, 4H), 6.92 – 6.83 (m, 6H), 4.46 – 4.31 (m, 2H), 4.08 – 3.99 (m, 2H), 3.95 (t,  $J = 6.5$  Hz, 4H), 2.00 – 1.90 (m, 1H), 1.78 (dt,  $J = 14.7, 6.7$  Hz, 4H), 1.70 – 1.60 (m, 1H), 1.52 – 1.45 (m, 4H), 1.41 – 1.33 (m, 12H), 1.33 – 1.16 (m, 12H), 0.95 – 0.82 (m, 18H).  $^{13}\text{C}$  NMR (100 MHz, Methylene Chloride- $d_2$ )  $\delta$  191.99, 162.97, 162.11, 156.89, 152.64, 150.47, 148.57, 147.78, 143.46, 143.39, 143.22, 141.53, 140.18, 139.45, 136.64, 135.42, 135.31, 130.98, 130.88, 129.50, 128.90, 128.14, 127.88, 127.39, 127.28, 127.17, 126.06, 124.54, 123.40, 119.56, 115.94, 111.82, 108.75, 68.89, 46.47, 40.43, 39.86, 32.20, 31.18, 30.87, 29.88, 29.26, 29.09, 27.51, 26.32, 24.51, 24.19, 23.70, 23.66, 23.22, 14.47, 14.44, 14.42, 11.18, 10.90.

### DPP10, HexOTPA-Th-DPP\_EtHex-Py-PhenylCAA

In a 25 mL single-neck round-bottom flask, 100 mg of HexOTPA-Th-DPP\_EthHex-Py-Benzaldehyde (0.09 mmol) and 65 mg cyanoacetic acid (0.76 mmol) was dissolved in 3 mL DCM, 1.5 mL triethylamine, and 1 drop piperidine. A spatula of MgSO<sub>4</sub> was added to this reaction and then heated to 40 °C overnight. In the morning, the reaction was diluted with DCM and extracted with a water and acetic acid solution, and then pure water. Crude product was rotovapped and then loaded onto a silica column and eluted with 2:3:95 acetic acid:methanol:DCM eluent. 48 mg (45% yield) of blue solid was obtained.

<sup>1</sup>H NMR (600 MHz, THF-d<sub>8</sub>) δ 9.44 (d, *J* = 4.1 Hz, 1H), 9.31 (d, *J* = 8.5 Hz, 1H), 9.15 (d, *J* = 2.0 Hz, 1H), 8.36 (d, *J* = 7.3 Hz, 2H), 8.37 (s, 1H), 8.27 (d, *J* = 8.1 Hz, 1H), 8.05 (d, *J* = 8.3 Hz, 2H), 7.60 (d, *J* = 8.4 Hz, 2H), 7.56 (d, *J* = 4.4 Hz, 1H), 7.11 (d, *J* = 8.8 Hz, 4H), 6.94 (d, *J* = 8.7 Hz, 3H), 6.92 (d, *J* = 9.0 Hz, 4H), 4.20 – 4.09 (m, 2H), 4.57 – 4.47 (m, 2H), 3.99 (t, *J* = 6.4 Hz, 4H), 2.12 – 1.99 (m, 1H), 1.81 (dd, *J* = 8.4, 6.2 Hz, 4H), 1.75 – 1.70 (m, 1H) [under THF solvent peak], 1.56 – 1.50 (m, 4H), 1.50 – 1.23 (m, 24H), 0.97 (h, *J* = 4.4, 3.6 Hz, 8H), 0.95 – 0.84 (m, 10H). <sup>13</sup>C NMR (150 MHz, THF-d<sub>8</sub>) δ 163.81, 163.15, 162.29, 157.55, 153.91, 153.00, 151.12, 149.09, 148.19, 143.23, 142.28, 141.92, 140.87, 140.17, 135.78, 133.20, 132.71, 128.55, 128.19, 127.82, 127.79, 125.35, 124.01, 120.33, 116.42, 116.28, 112.23, 109.27, 105.22, 68.94, 68.07, 46.74, 46.52, 40.99, 40.46, 32.77, 31.65, 31.25, 30.82, 30.47, 29.66, 29.47, 26.93, 25.96, 24.87, 24.51, 24.15, 23.73, 14.60, 14.57, 11.29, 10.94. C<sub>71</sub>H<sub>83</sub>N<sub>5</sub>O<sub>6</sub>S[M<sup>+</sup>] Exact Mass = 1133.6064, MS (MALDI) = 1133.6086

### Th-DPP\_EthHex-Ph-FluoroBenzaldehyde

In a 50 mL single-neck round-bottom flask, 0.8 grams of Th-DPP\_EtHex-Ph-Br (1.34 mmol), 0.4 grams of 3-Fluoro-4-formylphenylboronic acid, pinacol ester (1.61 mmol), and 0.85 gram of potassium phosphate tribasic (4.00 mmol) were dissolved in 13 mL of toluene, 1 mL tAmylOH, and 0.5 mL water. This solution was degassed for 20 minutes with a stream of N<sub>2</sub>, after which time 10 mg of Pd<sub>2</sub>dba<sub>3</sub> and 20 mg of X-Phos were added simultaneously, in one batch. The reaction was then brought to 80 °C for 6 hours, and then diluted with DCM and plugged through a thin pad of MgSO<sub>4</sub> with DCM. Volatile organics were removed and the crude compound loaded onto a medium column loaded with 200 mL of silica. A gradient eluent of 40:60 Toluene:DCM to 100% DCM was used to purify the compound. 700 mg (82% yield) of a pure red solid was obtained.

<sup>1</sup>H NMR (400 MHz, Methylene Chloride-d<sub>2</sub>) δ 10.38 (s, 1H), 8.91 (dd, *J* = 3.9, 1.1 Hz, 1H), 7.97 (d, *J* = 7.7 Hz, 1H), 7.92 (d, *J* = 8.5 Hz, 2H), 7.81 (d, *J* = 8.4 Hz, 2H), 7.72 (dd, *J* = 5.0, 1.2 Hz, 1H), 7.62 (dd, *J* = 8.1, 1.6 Hz, 1H), 7.51 (dd, *J* = 11.6, 1.6 Hz, 1H), 7.31 (dd, *J* = 5.0, 3.9 Hz, 1H), 4.03 – 3.91 (m, 2H), 3.91 – 3.77 (m, 2H), 1.86 – 1.73 (m, 1H), 1.55 – 1.45 (m, 1H), 1.40 – 1.00 (m, 16H), 0.91 – 0.82 (m, 6H), 0.75 (dt, *J* = 17.7, 6.9 Hz, 6H). <sup>13</sup>C NMR (100 MHz, Methylene Chloride-d<sub>2</sub>) δ 186.90, 186.84, 166.59, 164.03, 162.62, 162.32, 148.60, 148.51,

145.87, 142.72, 140.68, 140.67, 136.23, 131.85, 130.34, 130.03, 129.89, 129.81, 129.78, 128.86, 127.91, 123.82, 123.78, 123.75, 115.35, 115.13, 110.66, 108.40, 46.03, 45.46, 39.66, 39.65, 39.24, 32.50, 31.80, 30.85, 30.83, 30.75, 30.73, 30.50, 30.27, 30.23, 30.22, 29.93, 28.95, 28.93, 28.82, 25.42, 24.30, 24.09, 24.08, 23.63, 23.38, 23.27, 14.49, 14.39, 14.38, 14.33, 10.80, 10.78.

#### Br-Th-DPP EthHex-Ph-FluoroBenzaldehyde

The reaction and purification were performed in the same manner as for the synthesis of Br-Th-DPP\_EtHex-Py-Benzaldehyde. 200 mg (26% yield) of a red/purple solid. This product was used semi-crude, because complete purification was not possible – separation of a completely pure material was achieved on the following step.

#### HexOTPA-Th-DPP EthHex-Ph-FluoroBenzaldehyde

The reaction and purification were performed in the same manner as for the synthesis of HexOTPA-Th-DPP\_EtHex-Py-Benzaldehyde. 100 mg (33% yield) of a purple-ish solid.

$^1\text{H}$  NMR (400 MHz, Methylene Chloride- $d_2$ )  $\delta$  10.40 (s, 1H), 9.08 (d,  $J = 4.2$  Hz, 1H), 8.02 – 7.93 (m, 1H), 7.94 (d,  $J = 8.3$  Hz, 2H), 7.82 (d,  $J = 8.4$  Hz, 2H), 7.63 (dd,  $J = 8.1, 1.5$  Hz, 1H), 7.55 – 7.49 (m, 3H), 7.40 (d,  $J = 4.2$  Hz, 1H), 7.14 – 7.07 (m, 4H), 6.94 – 6.87 (m, 6H), 4.08 – 3.83 (m, 8H), 1.93 – 1.89 (m, 1H), 1.80 (dt,  $J = 14.6, 6.7$  Hz, 4H), 1.55 – 1.45 (m, 5H), 1.44 – 1.06 (m, 24H), 0.99 – 0.85 (m, 12H), 0.83 – 0.72 (m, 6H).  $^{13}\text{C}$  NMR (100 MHz,  $\text{CD}_2\text{Cl}_2$ )  $\delta$  187.14, 187.09, 166.69, 164.12, 162.92, 162.30, 156.87, 152.16, 150.43, 148.76, 144.45, 143.16, 140.61, 140.24, 138.57, 130.99, 130.19, 129.98, 129.89, 129.87, 129.51, 128.90, 128.00, 127.85, 127.46, 127.37, 125.19, 124.65, 123.90, 123.87, 123.85, 123.76, 123.28, 119.67, 115.94, 115.60, 115.47, 115.26, 111.00, 107.90, 68.90, 46.17, 45.60, 39.83, 39.34, 32.19, 30.88, 30.28, 29.87, 29.12, 28.87, 26.30, 24.32, 24.20, 23.67, 23.41, 23.21, 14.42, 14.39, 14.33, 10.88, 10.82.

#### DPP12, HexOTPA-Th-DPP EthHex-Ph-FluorophenylCAA

The reaction and purification were performed in the same manner as for the synthesis of **DPP10**. 45 mg (42% yield) of a purple solid.

$^1\text{H}$  NMR (600 MHz, THF- $d_8$ )  $\delta$  9.28 (s, 1H), 8.65 – 8.45 (m, 2H), 8.11 (d,  $J = 8.5$  Hz, 2H), 8.00 (d,  $J = 8.5$  Hz, 2H), 7.87 (d,  $J = 8.2$  Hz, 1H), 7.81 (d,  $J = 11.2$  Hz, 1H), 7.58 (d,  $J = 8.2$  Hz, 2H), 7.54 (d,  $J = 4.3$  Hz, 1H), 7.11 (d,  $J = 8.7$  Hz, 4H), 7.01 – 6.81 (m, 6H), 4.41 – 3.91 (m, 8H), 2.29 – 2.21 (m, 1H), 2.10 – 1.98 (m, 4H), 1.70 – 1.45 (m, 5H), 1.51 – 1.26 (m, 24H), 0.94 – 0.78 (m, 12H), 0.77 – 0.73 (m, 6H).  $^{13}\text{C}$  NMR (150 MHz, THF- $d_8$ )  $\delta$  162.35, 161.62, 161.33, 156.35, 151.18, 149.85, 146.65, 143.61, 141.84, 139.78, 139.60, 138.12, 129.66, 129.42, 129.26, 127.06, 126.99, 126.83, 126.59, 124.32, 123.17, 122.68, 119.38, 119.26, 115.11, 114.98, 114.00, 110.21, 107.31, 105.60, 67.77, 45.09, 44.56, 39.32, 38.70, 31.61, 30.27, 29.67, 29.31, 28.35, 28.16, 25.77, 23.60, 23.39, 22.99, 22.76, 22.57, 13.42, 13.35, 9.78.  $\text{C}_{72}\text{H}_{83}\text{FN}_4\text{O}_6\text{S}[\text{M}^+]$  Exact Mass = 1150.6017, MS (MALDI) = 1150.6003

### Computational discussion:

Concerning the electron affinity of pyridine, and the relevance of this affinity to the visible light absorption spectrum, **Figure S1** compares **DPP10** and **DPP03** (a symmetric DPP dye reported in our previous study<sup>11</sup>). It is clear that the thiophene provides a lower bandgap; the electron affinity of pyridine is not likely the greatest factor in causing the red-shift for **DPP10** compared to **DPP03**.

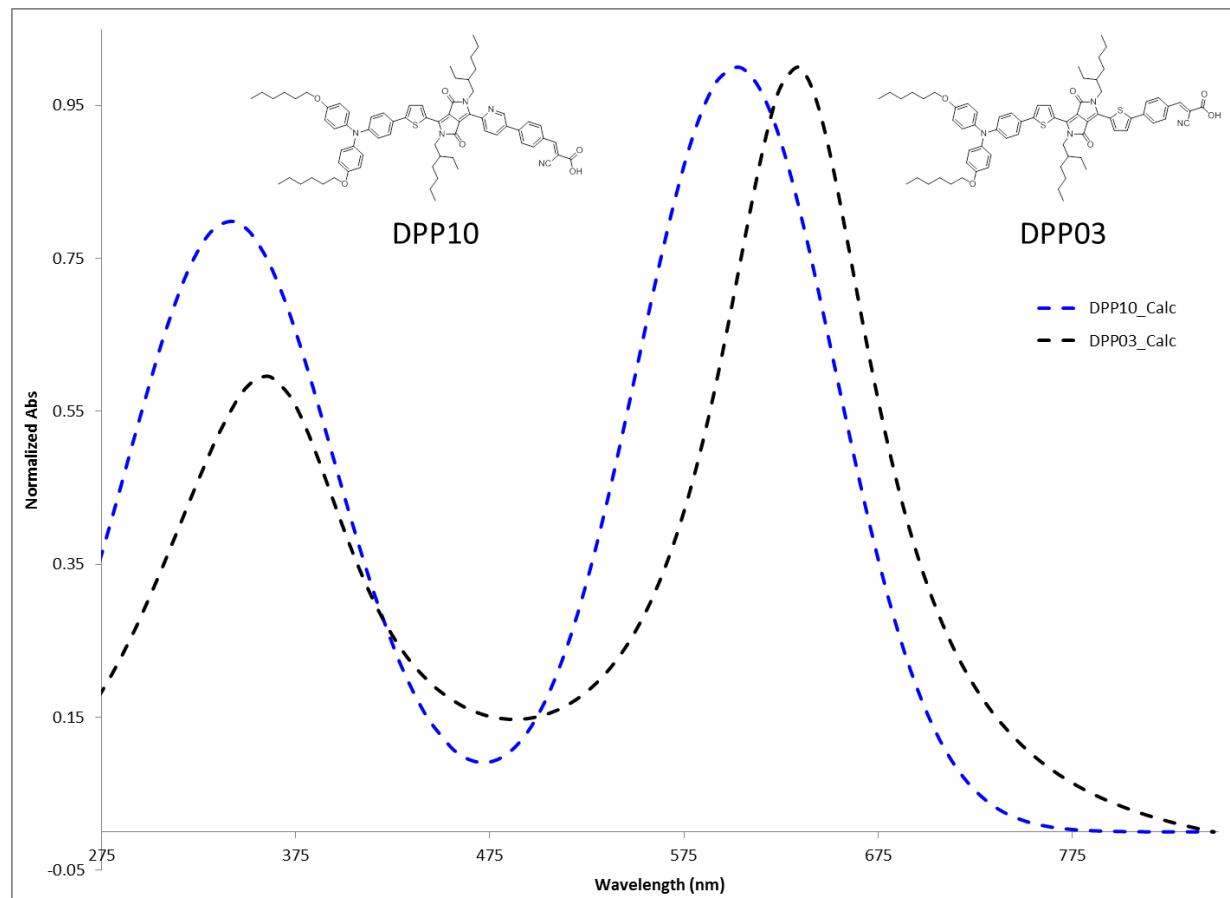

**Figure S1.** The effect of pyridine compared to thiophene substitution on the DPP chromophore. The calculation was performed as described in the main text.

**Table S1.** Averaged photovoltaic characteristics of DPP dyes, corresponding to Table 2 in the main text.

| Dye          | Electrolyte                                 | $J_{sc}$ (mA cm <sup>-2</sup> ) | $V_{oc}$ (mV) | $FF$ (%)   | $\eta$ (%)  |
|--------------|---------------------------------------------|---------------------------------|---------------|------------|-------------|
| <b>DPP07</b> | I <sub>3</sub> <sup>-</sup> /I <sup>-</sup> | 15.8 ± 0.08                     | 667 ± 1       | 69.2 ± 0.4 | 7.29 ± 0.01 |
|              | Co[(bpy)] <sup>3+/2+</sup>                  | 15.0 ± 0.08                     | 776 ± 3       | 67.0 ± 1.5 | 7.79 ± 0.25 |
| <b>DPP10</b> | I <sub>3</sub> <sup>-</sup> /I <sup>-</sup> | 11.8 ± 0.01                     | 665 ± 1       | 69.2 ± 0.1 | 5.44 ± 0.02 |
|              | Co[(bpy)] <sup>3+/2+</sup>                  | 11.9 ± 0.09                     | 730 ± 1       | 70.5 ± 0.3 | 6.13 ± 0.07 |
| <b>DPP12</b> | I <sub>3</sub> <sup>-</sup> /I <sup>-</sup> | 15.6 ± 0.12                     | 698 ± 3       | 66.8 ± 0.2 | 7.28 ± 0.02 |
|              | Co[(bpy)] <sup>3+/2+</sup>                  | 13.2 ± 0.04                     | 746 ± 3       | 68.3 ± 0.5 | 6.99 ± 0.01 |

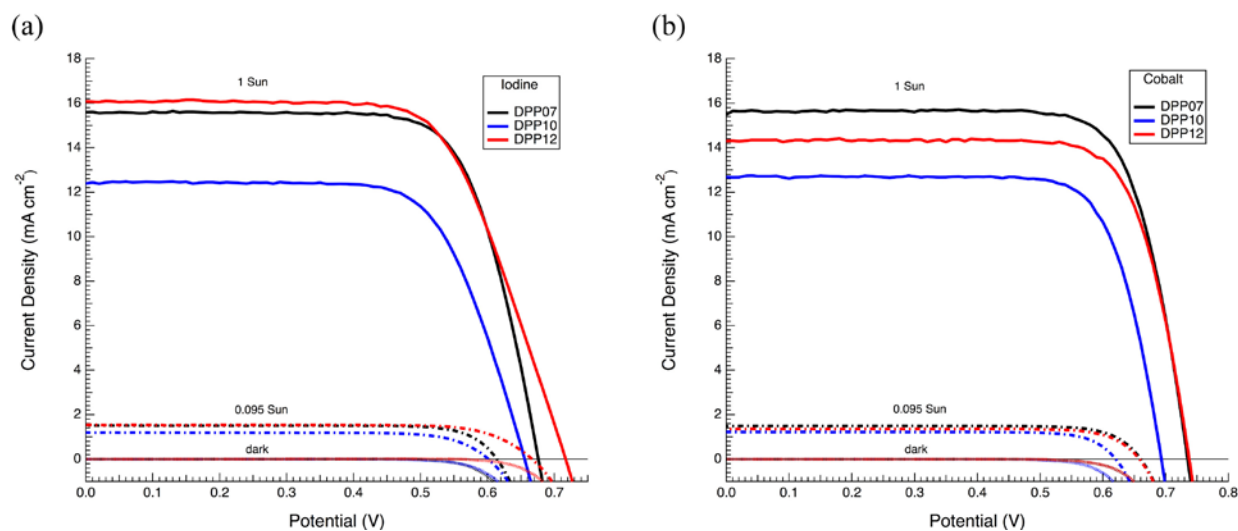

**Figure S2.** *JVs* of the best photovoltaic performance of DPP dyes. DSCs sensitized with **DPP07** (black lines), **DPP10** (blue lines), and **DPP12** (red lines) with (a) I<sub>3</sub><sup>-</sup>/I<sup>-</sup> electrolyte and (b) Co[(bpy)]<sup>3+/2+</sup> electrolyte.

## References

1. T. W. Holcombe, J.-H. Yum, J. Yoon, P. Gao, M. Marszalek, D. D. Censo, K. Rakstys, M. K. Nazeeruddin and M. Graetzel, *Chem. Commun.*, 2012, **48**, 10724-10726.
